# Supplementary material for: Osteoclasts control reactivation of dormant myeloma cells by remodelling the endosteal niche
Source: PubMed Central journal article supplement (PMC4686867; doi:10.1038/ncomms9983), 2015-12-03
Supplement: ncomms9983-s1.pdf [file ncomms9983-s1.pdf]

## Supplementary Figure 1

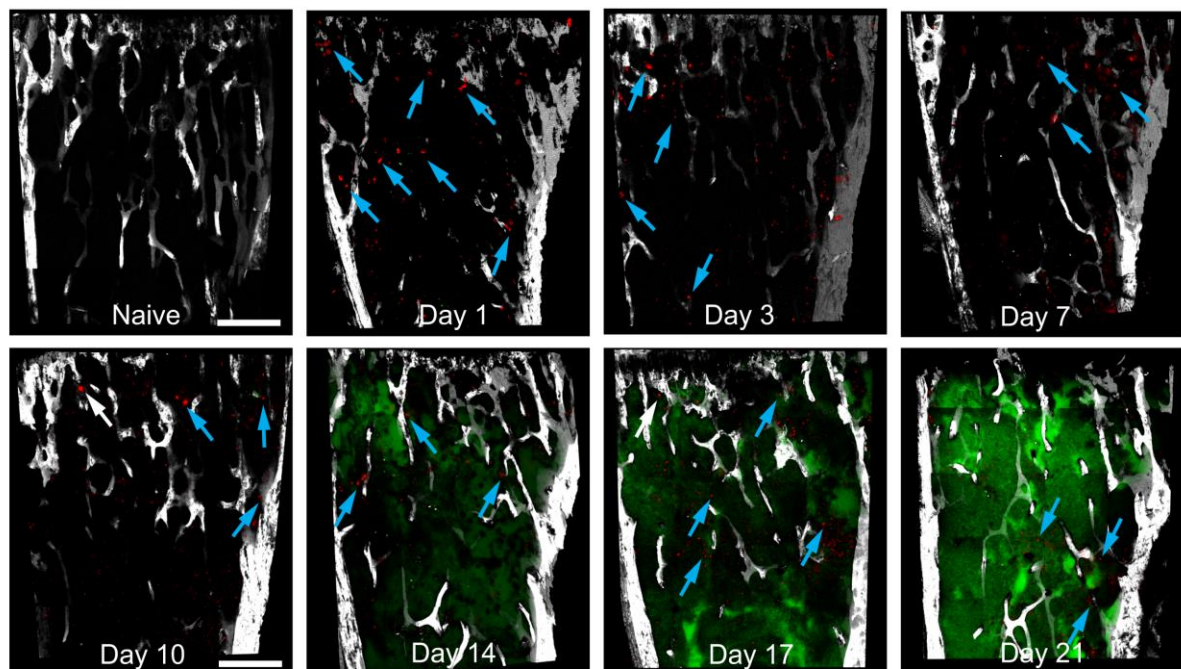

**Supplementary Figure 1. Dormant cells persist *in vivo* 21 days post injection.** Mosaic tile images from two-photon imaging of explanted tibia up to 21 days following injection of 5TGM1 a cells compared to naïve mice not injected with 5TGM1 cells (first panel). GFP<sup>+</sup>DiD<sup>+</sup> cells (blue arrows) located adjacent to bone surfaces at all time points up to 21 days post injection. Scale bar, 200 $\mu$ m. Bone SHG, white; GFP<sup>+</sup>DiD<sup>+</sup> cells, red; GFP<sup>+</sup>DiD<sup>neg</sup> cells, green. Data represent at least 3 experiments.

Supplementary Figure 2.

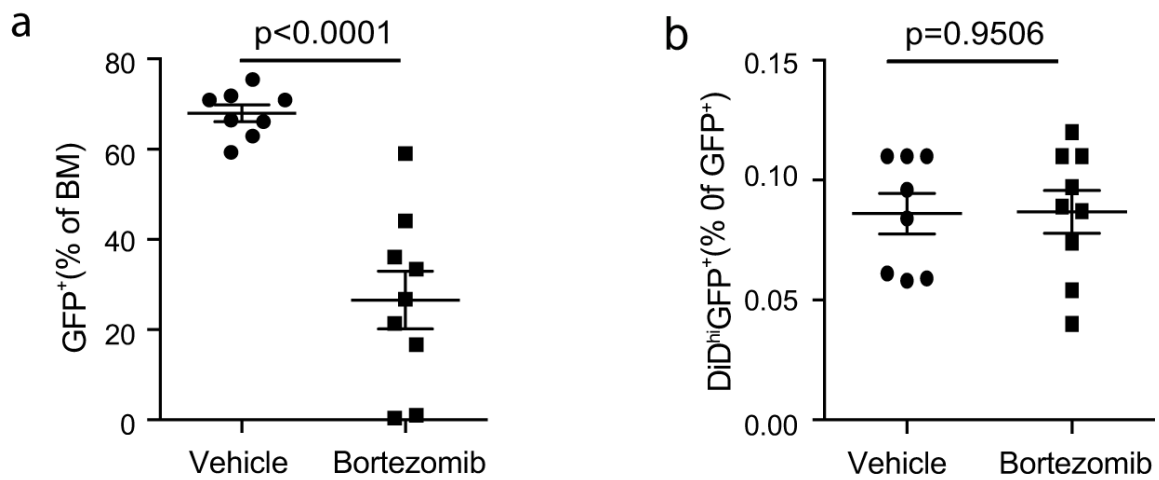

**Supplementary Figure 2. Proliferating and dormant cells populations respond similarly to the proteasome inhibitor Bortezomib.** FACS analysis of bone marrow from vehicle and Bortezomib treated 5TGM1 burdened mice. **a)** GFP<sup>+</sup> cells (% of bone marrow cells) and **b)** GFP<sup>+</sup>DiD<sup>hi</sup> cells (% of GFP<sup>+</sup> cells). Data show mean ± SEM and represent 8-10 mice per group, unpaired ttest.

Supplementary Table 1:

Gene ontologies associated with cell cycle that are down-regulated in dormant (DiD<sup>hi</sup>) cells

| Cell Cycle Process | Gene Ontology:ID | Direction | Genes                                                                                                                                                                               |
|--------------------|------------------|-----------|-------------------------------------------------------------------------------------------------------------------------------------------------------------------------------------|
| Cell division      | GO:0051301       | Down      | <i>2610039C10Rik, 2610002M06Rik, Anapc10, Anln, Cenph, F630043A04Rik, Fam83d, Katna1, Kif20b, Ndc80, Nuf2, Nup37, Pmf1, Ska1, Smc2, Vps4a, Wee1</i>                                 |
| Mitotic cell cycle | GO:0000278       | Down      | <i>2610039C10Rik, Anapc10, Anln, Cenph, F630043A04Rik, Fam83d, Hinfp, Katna1, Kif20b, Ndc80, Nuf2, Nup37, Pmf1, Rps6ka2, Ska1, Smc2, Wee1</i>                                       |
| Cell cycle process | GO:0022402       | Down      | <i>2610039C10Rik, Anapc10, Anln, Cenph, F630043A04Rik, Fam83d, Hinfp, Katna1, Kif20b, Klhdc3, Mlh3, Ndc80, Nuf2, Nup37, Pmf1, Rad50, Rps6ka2, Ska1, Smc2, Suv39h2, Trip13, Wee1</i> |

All enrichment categories Bonferroni <0.05.

**Supplementary Table 1.** Gene ontologies associated with cell cycle that are down-regulated in dormant (DiD<sup>hi</sup>) cells.

Supplementary Table 2: Differentially expressed genes in dormant (DiD<sup>hi</sup>) cells

| Top 100 up regulated in dormant (DiD <sup>hi</sup> ) cells   |       |                             |       |                             |       |
|--------------------------------------------------------------|-------|-----------------------------|-------|-----------------------------|-------|
| Gene Symbol / Transcript ID                                  | absFC | Gene Symbol / Transcript ID | absFC | Gene Symbol / Transcript ID | absFC |
| LOC100862132                                                 | 13.11 | Mir302b                     | 5.66  | ENSMUST00000157188          | 4.24  |
| Lilrb4                                                       | 10.82 | Bcl2a1a                     | 5.59  | ENSMUST00000158455          | 4.19  |
| Ctsc                                                         | 10.04 | Cd97                        | 5.51  | ENSMUST00000103327          | 4.17  |
| Fabp5                                                        | 9.90  | H2-Aa                       | 5.44  | Bcl2a1b                     | 4.15  |
| Anpep                                                        | 9.60  | AF251705                    | 5.43  | Irf7                        | 4.14  |
| Mpeg1                                                        | 9.32  | Lilrb3                      | 5.33  | Ifi205                      | 4.12  |
| Spic                                                         | 8.74  | Gm19528                     | 5.32  | Fyb                         | 4.11  |
| Gm9340                                                       | 8.21  | Snord37                     | 5.31  | Ly6g                        | 4.09  |
| C1qb                                                         | 8.12  | Ccl12                       | 5.20  | ENSMUST00000158348          | 4.09  |
| ENSMUST00000158834                                           | 7.96  | ENSMUST00000158950          | 5.18  | Atp6v0d2                    | 4.08  |
| Fcgr1                                                        | 7.91  | Gm20559                     | 4.97  | Gpnmb                       | 4.07  |
| Fcer1g                                                       | 7.89  | S100a6                      | 4.96  | Lcp2                        | 4.07  |
| Arl6ip1                                                      | 7.86  | ENSMUST00000104369          | 4.90  | AW112010                    | 4.07  |
| Tyrobp                                                       | 7.78  | Snord35b                    | 4.90  | LOC100862211                | 4.05  |
| ENSMUST00000158671                                           | 7.30  | Tlr7                        | 4.84  | Axl                         | 4.02  |
| Tmem106a                                                     | 6.94  | DQ340292                    | 4.82  | ENSMUST00000083119          | 4.02  |
| Ms4a7                                                        | 6.83  | ENSMUST00000158532          | 4.81  | Cxcl9                       | 3.98  |
| Cd63                                                         | 6.79  | Sirpa                       | 4.76  | Hmox1                       | 3.97  |
| Mmp12                                                        | 6.77  | Ccl8                        | 4.73  | Hpgd                        | 3.94  |
| H2-Ab1                                                       | 6.75  | Cd84                        | 4.64  | Cyp4v3                      | 3.93  |
| Vcam1                                                        | 6.73  | Rgs2                        | 4.61  | Lyz2                        | 3.92  |
| Lst1                                                         | 6.69  | Fabp4                       | 4.56  | Vim                         | 3.88  |
| AB124611                                                     | 6.67  | Sh3bgrl3                    | 4.54  | ENSMUST00000160463          | 3.87  |
| Gm11428                                                      | 6.46  | Fam105a                     | 4.47  | Olfir739                    | 3.87  |
| Ifitm2                                                       | 6.39  | Ccl2                        | 4.46  | Rgs1                        | 3.83  |
| Bcl2a1d                                                      | 6.17  | Emp1                        | 4.43  | Npl                         | 3.80  |
| Slc40a1                                                      | 6.09  | Ngp                         | 4.39  | Cd180                       | 3.80  |
| ENSMUST00000082533                                           | 6.02  | Ctsh                        | 4.37  | Mir302c                     | 3.78  |
| C4b                                                          | 5.89  | Cd5l                        | 4.34  | Slc15a3                     | 3.75  |
| Rtp4                                                         | 5.82  | Lgals3bp                    | 4.33  | ENSMUST00000173249          | 3.75  |
| Clec4a3                                                      | 5.76  | Itgax                       | 4.33  | Mfsd1                       | 3.73  |
| Pltp                                                         | 5.76  | ENSMUST00000083425          | 4.30  | Ifi44                       | 3.71  |
| Fcgr4                                                        | 5.68  | Csf1r                       | 4.30  | Mrc1                        | 3.70  |
|                                                              |       |                             |       | Gpr65                       | 3.68  |
| Top 100 down regulated in dormant (DiD <sup>hi</sup> ) cells |       |                             |       |                             |       |
| Gene Symbol / Transcript ID                                  | absFC | Gene Symbol / Transcript ID | absFC | Gene Symbol / Transcript ID | absFC |
| ENSMUST00000082919                                           | 9.06  | Klf12                       | 3.26  | Ankrd49                     | 2.91  |
| Snora17                                                      | 8.37  | Slc30a6                     | 3.26  | ENSMUST00000157749          | 2.90  |
| 4930522L14Rik                                                | 6.07  | ENSMUST00000157817          | 3.24  | 2610039C10Rik               | 2.89  |
| ENSMUST00000158766                                           | 4.94  | Pip4k2b                     | 3.24  | ENSMUST00000175498          | 2.89  |
| Ppan                                                         | 4.90  | Zfp433                      | 3.24  | Fam58b                      | 2.87  |
| Snord73a                                                     | 4.90  | Zxdb                        | 3.21  | Esco2                       | 2.87  |
| 5730408K05Rik                                                | 4.89  | Gm9958                      | 3.17  | Zfp825                      | 2.86  |
| 1810007I06Rik                                                | 4.69  | Hist1h2bh                   | 3.17  | Nts                         | 2.85  |
| Gm15363                                                      | 4.56  | ENSMUST00000083721          | 3.15  | Tmed1                       | 2.85  |
| Gm5751                                                       | 4.51  | ENSMUST00000158504          | 3.15  | ENSMUST00000104118          | 2.85  |
| ENSMUST00000122729                                           | 4.49  | ENSMUST00000083026          | 3.14  | Ppp6r2                      | 2.84  |
| ENSMUST00000083102                                           | 4.40  | Ndc80                       | 3.14  | ENSMUST00000175017          | 2.84  |
| Trip13                                                       | 4.03  | Ndufb11                     | 3.13  | 1810031K17Rik               | 2.83  |
| Mir15a                                                       | 4.02  | Hist1h1a                    | 3.13  | Bckdhb                      | 2.83  |
| Copz1                                                        | 3.89  | 2310058D17Rik               | 3.10  | 17475704                    | 2.82  |
| Hist1h2bg                                                    | 3.83  | ENSMUST00000102427          | 3.09  | Lmf2                        | 2.82  |
| ENSMUST00000157558                                           | 3.81  | ENSMUST00000083993          | 3.09  | Fam20b                      | 2.81  |
| Mir103-2                                                     | 3.72  | Hmga1-rs1                   | 3.08  | BC080809                    | 2.81  |
| Mettl21d                                                     | 3.71  | ENSMUST00000122495          | 3.07  | ENSMUST00000158552          | 2.79  |
| Odf2l                                                        | 3.68  | ENSMUST00000082493          | 3.05  | ENSMUST00000175310          | 2.79  |
| ENSMUST00000157098                                           | 3.63  | 9130206I24Rik               | 3.04  | Mir5099                     | 2.79  |
| Snora69                                                      | 3.62  | ENSMUST00000054878          | 3.03  | ENSMUST00000173128          | 2.78  |
| ENSMUST00000157760                                           | 3.59  | 2210418O10Rik               | 3.01  | ENSMUST00000157125          | 2.78  |
| E330020D12Rik                                                | 3.58  | AJ555622                    | 3.01  | ENSMUST00000083107          | 2.77  |
| ENSMUST00000082596                                           | 3.42  | ENSMUST00000157643          | 2.98  | Stk3                        | 2.76  |
| Jrkl                                                         | 3.39  | ENSMUST00000157653          | 2.97  | Atg5                        | 2.75  |
| 2410019O14Rik                                                | 3.37  | Rnf7                        | 2.97  | Tmem55a                     | 2.74  |
| Snord15b                                                     | 3.37  | Ddit4                       | 2.93  | Taf8                        | 2.73  |
| Gm20186                                                      | 3.36  | LOC100861983                | 2.93  | ENSMUST00000158372          | 2.73  |
| Hrsp12                                                       | 3.35  | Sptlc1                      | 2.92  | LOC100862646                | 2.73  |
| 4932425I24Rik                                                | 3.31  | Snord11                     | 2.92  | 2610044O15Rik               | 2.71  |
| Mrpl34                                                       | 3.29  | 1190007I07Rik               | 2.92  | Qtrtd1                      | 2.71  |
| Pmf1                                                         | 3.27  | Gstt2                       | 2.91  | Mzt2                        | 2.71  |
|                                                              |       |                             |       | Pmaip1                      | 2.71  |

All genes Q value &lt;0.05.

**Supplementary Table 2.** Top 200 differentially expressed genes in dormant (GFP<sup>+</sup>DiD<sup>hi</sup>) cells.

Gene lists based on filtering criteria fold change >2, Q value <0.05.
